# Supplementary material for: A sustainable method for oxidizing phenanthrene in tropical soil using natural iron as a catalyst in a slurry phase reactor with persulfate assistance
Source: Royal Society of Chemistry journal article supplement (doi:10.1039/d4em00328d), 2024-01-01
Supplement: d4em00328d1.pdf [file d4em00328d1.pdf]

**Supporting information**

**A sustainable method for oxidizing phenanthrene in tropical soil using natural iron as a catalyst in a slurry phase reactor with persulfate assistance**

**Mohammad Qutob<sup>1</sup>, Mohd Rafatullah<sup>1,\*</sup>, Syahidah Akmal Muhammad<sup>1</sup>, Masoom Raza Siddiqui<sup>2</sup>, Mahboob Alam<sup>3</sup>**

*<sup>1</sup>Environmental Technology Division, School of Industrial Technology, Universiti Sains Malaysia, Penang 11800, Malaysia*

*<sup>2</sup>Chemistry Department, College of Science, King Saud University, Riyadh 11451, Saudi Arabia*

*<sup>3</sup>Division of Chemistry and Biotechnology, Dongguk University, 123, Dongdaero, Gyeongju-si 780714, Republic of Korea*

Corresponding author\*:

E-mail address: mohd\_rafatullah@yahoo.co.in; mrafatullah@usm.my (MR)

Tel: +6046532111; Fax: +604656375

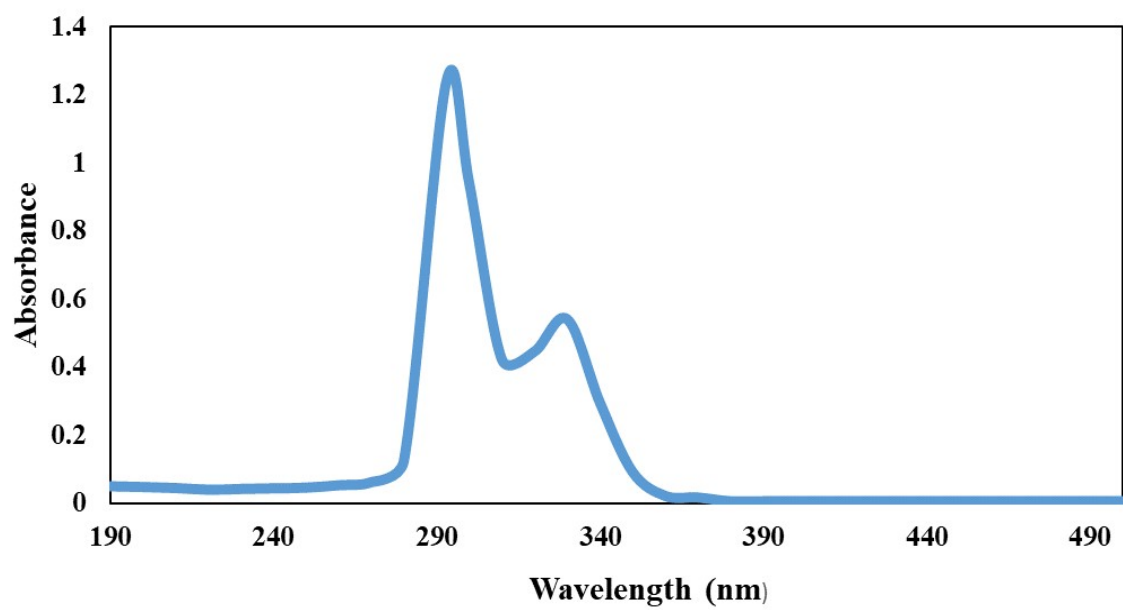

**Fig. S1. The spectrum of the phenanthrene absorbance by UV-spectrophotometer.**

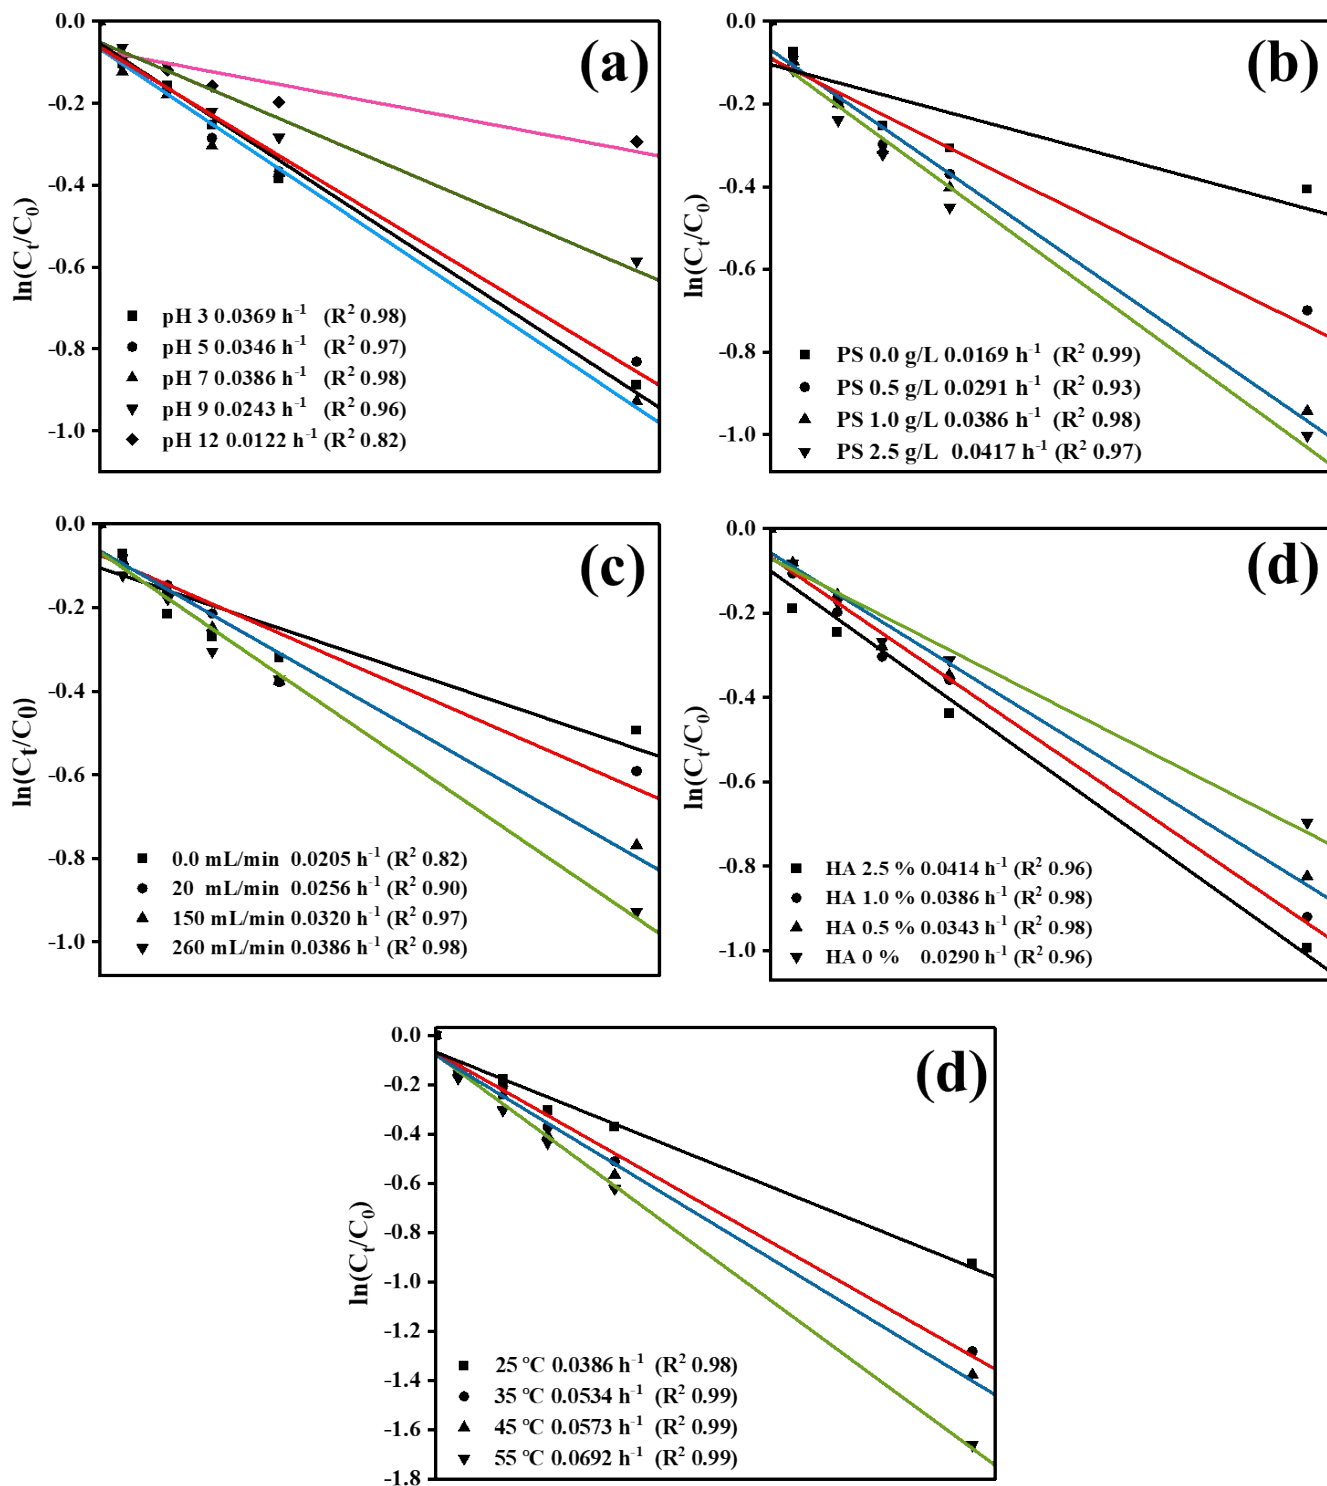

Fig. S2.  $\ln(C_t/C_0)$  of PHE removal under different experimental conditions (a) pH, (b) PS, (c) airflow, (d) HA%, and (e) Temperature.

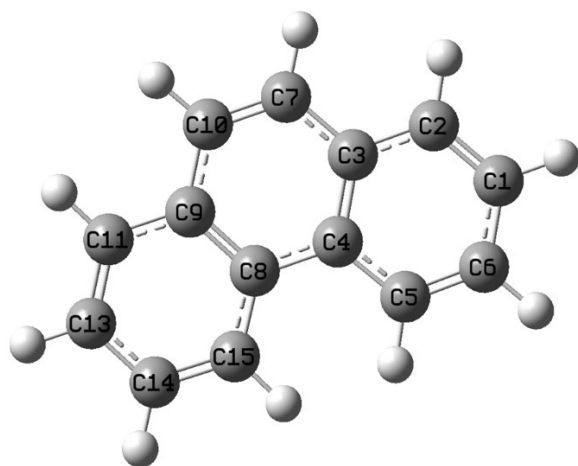

| Atom | $q_i(N)$ | $q_i(N + 1)$ | $q_i(N - 1)$ | $f^+$  | $f^-$  | $f^\circ$ |
|------|----------|--------------|--------------|--------|--------|-----------|
| C1   | -0.139   | -0.083       | 0.176        | 0.056  | -0.316 | 0.130     |
| C2   | 0.060    | 0.192        | -0.051       | 0.131  | 0.112  | -0.122    |
| C3   | 0.385    | 0.359        | 0.377        | -0.025 | 0.008  | 0.008     |
| C4   | -0.261   | -0.293       | -0.249       | -0.031 | -0.011 | 0.021     |
| C5   | 0.036    | 0.157        | -0.017       | 0.121  | 0.053  | -0.087    |
| C6   | -0.159   | -0.062       | -0.317       | 0.097  | 0.158  | -0.127    |
| C7   | 0.078    | 0.229        | -0.064       | 0.151  | 0.142  | -0.147    |
| C8   | -0.261   | -0.293       | -0.249       | -0.031 | -0.011 | 0.021     |
| C9   | 0.385    | 0.360        | 0.377        | -0.025 | 0.008  | 0.008     |
| C10  | 0.077    | 0.229        | -0.064       | 0.151  | 0.142  | -0.147    |
| C11  | 0.060    | 0.192        | -0.051       | 0.131  | 0.112  | -0.121    |
| C13  | -0.139   | -0.083       | -0.176       | 0.056  | 0.036  | -0.046    |
| C14  | -0.159   | -0.062       | -0.317       | 0.097  | 0.158  | -0.127    |
| C15  | 0.036    | 0.157        | -0.017       | 0.121  | 0.053  | -0.087    |

**Fig. S3.** the values of nucleophilic attack, electrophilic attack, and radical attack.

**Table S1: The studies that investigated the degradation of PHE via different AOP systems**

| Pollutant | System                                                                    | Experimental conditions                                                                                     | Degradation efficiency | Time   | Reference    |
|-----------|---------------------------------------------------------------------------|-------------------------------------------------------------------------------------------------------------|------------------------|--------|--------------|
| PHE       | Bacterial community in the combined system of photocatalysis              | [PHE] = 10 mg/L, T = 25°C                                                                                   | 88.6%                  | 6 h    | <sup>1</sup> |
| PHE       | Clay-based catalyst/PS/H <sub>2</sub> O <sub>2</sub>                      | [PHE] = 200 mg/kg, T = 28°C<br>pH = 5.7, [H <sub>2</sub> O <sub>2</sub> ] = 2.4g/L, [PS] = 41 g/L           | 83%                    | 3 days | <sup>2</sup> |
| PHE       | Fenton                                                                    | [PHE] = 90 mg/kg, T = 20°C, pH = 3, [H <sub>2</sub> O <sub>2</sub> ] = 882 mmol/L, [Fe] = 1 mmol/L          | 80%                    | 5 days | <sup>3</sup> |
| PHE       | UVB activation of hydrogen peroxide and peroxydisulfate                   | [PHE] = 10 mg/L, T = 25°C<br>[TW80] = 0.5 g/L, [PDS] = [H <sub>2</sub> O <sub>2</sub> ] = 5 mM, pH 3.       | 85%                    | 6 h    | <sup>4</sup> |
| PHE       | Microwave-activated persulfate                                            | [PHE] = 1000 mg/kg, T = 60 °C, [PS] = 50 g/L.                                                               | 100%                   | 1 h    | <sup>5</sup> |
| PHE       | Oxidation by PS and Fe-Modified Diatomite (Ex-situ)                       | [PHE] = 200 mg/kg.                                                                                          | 77%                    | 7 days | <sup>6</sup> |
| PHE       | Electrokinetically-delivered persulfate (Ex-situ)                         | [PHE] = 299 mg/kg.                                                                                          | 88%                    | 7 days | <sup>7</sup> |
| ΣPAHs     | Electro-Fenton                                                            | [ΣPAHs] = 3605 mg/kg,                                                                                       | 28%                    | 2 days | <sup>8</sup> |
| PHE       | UV/PS                                                                     | [PHE] = 10 mg/L, [TW 80] = 10 g/L, [H <sub>2</sub> O <sub>2</sub> ] = [PS] = 10 mM, pH 6.4, UV power = 6 W. | 90%                    | 1 day  | <sup>9</sup> |
| PHE       | Soil naturally containing hematite as a catalyst of PS and O <sub>2</sub> | [PHE] = 300 mg/50g, [PS] = 1 g/L, pH 7, HA = 0.5%, Airflow 260 mL/min, T = 55 °C                            | 81%                    | 1 day  | This study   |

**Table S2: Soil physiochemical characteristics**

---

|                        |                                                     |
|------------------------|-----------------------------------------------------|
| Soil texture           | Sandy clay loam, Sand = 50%, Silt = 23%, Clay = 22% |
| Soil pH                | 2.9                                                 |
| Soil zero-point charge | 3.5                                                 |
| Bulk density           | 1.006 g/cm <sup>3</sup>                             |
| Soil organic matter    | 2.4%                                                |
| Soil taxonomy          | ultisols                                            |
| CEC                    | 9 cmolc/kg                                          |
| Soil salinity          | 15.2 $\mu$ S                                        |

---

**Table S3. XRD analysis for the soil sample presented the minerals and their lattice planes.**

| <b>2θ</b> | <b>lattice planes</b> | <b>Mineral</b> | <b>Card number</b> | <b>Reference</b> |
|-----------|-----------------------|----------------|--------------------|------------------|
| 12.3°     | (0 0 1)               | Kaolinite      | PDF card: 14-0164  | 39               |
| 20°       | (1 1 0)               | Kaolinite      | PDF card: 14-0164  | 39               |
| 20.8°     | (1 0 0)               | Quartz         | PDF card: 85-1054  | 40               |
| 24.9      | (0 0 2)               | Kaolinite      | PDF card: 14-0164  | 39               |
| 26.6°     | (1 0 1)               | Quartz         | PDF card: 85-1054  | 40               |
| 35°       | (1 0 4)               | Hematite       | PDF card: 89-8103  | 41               |
| 36.5°     | (1 1 0)               | Hematite       | PDF card: 89-8103  | 41               |
| 38.4°     | (- 2 0 2)             | Kaolinite      | PDF card: 14-0164  | 39               |
| 50.2°     | (1 1 2)               | Quartz         | PDF card: 85-1054  | 40               |
| 60°       | (1 2 1)               | Quartz         | PDF card: 85-1054  | 40               |
| 62.3°     | (6 0 6)               | Kaolinite      | PDF card: 14-0164  | 39               |
| 68.2°     | (0 3 1)               | Quartz         | PDF card: 85-1054  | 40               |

**Table S4: The removal rate and removal efficiency of [PHE] = 300 mg/50 g, [Fe<sup>2+</sup>] = g/L soil under different experimental conditions**

| pH | HA<br>(w/w<br>%) | Temperature<br>(°C) | Air flow<br>(mL/min) | PS<br>(g/L) | Pseudo- second order<br>reaction model               |                | Pseudo-first order<br>reaction model |                | Removal<br>efficiency |
|----|------------------|---------------------|----------------------|-------------|------------------------------------------------------|----------------|--------------------------------------|----------------|-----------------------|
|    |                  |                     |                      |             | Removal rate<br>(M <sup>-1</sup> . h <sup>-1</sup> ) | R <sup>2</sup> | Removal<br>rate (h <sup>-1</sup> )   | R <sup>2</sup> |                       |
| 3  | 0.5              | 25                  | 260                  | 1           | 3.877                                                | 0.724          | 0.0369                               | 0.98           | 58 %                  |
| 5  | 0.5              | 25                  | 260                  | 1           | 3.699                                                | 0.758          | 0.0346                               | 0.97           | 56 %                  |
| 7  | 0.5              | 25                  | 260                  | 1           | 3.903                                                | 0.711          | 0.0386                               | 0.98           | 60 %                  |
| 9  | 0.5              | 25                  | 260                  | 1           | 2.953                                                | 0.818          | 0.0243                               | 0.96           | 44 %                  |
| 12 | 0.5              | 25                  | 260                  | 1           | 1.493                                                | 0.961          | 0.0122                               | 0.82           | 25 %                  |
| 7  | 0.5              | 25                  | 260                  | 0           | 2.126                                                | 0.991          | 0.0169                               | 0.99           | 33 %                  |
| 7  | 0.5              | 25                  | 260                  | 0.5         | 3.423                                                | 0.854          | 0.0291                               | 0.93           | 50 %                  |
| 7  | 0.5              | 25                  | 260                  | 2.5         | 4.335                                                | 0.735          | 0.0417                               | 0.97           | 63 %                  |
| 7  | 0.5              | 35                  | 260                  | 1           | 4.107                                                | 0.735          | 0.0534                               | 0.99           | 73 %                  |
| 7  | 0.5              | 45                  | 260                  | 1           | 3.972                                                | 0.745          | 0.0573                               | 0.99           | 75 %                  |
| 7  | 0.5              | 55                  | 260                  | 1           | 3.459                                                | 0.791          | 0.0692                               | 0.99           | 81 %                  |
| 7  | 0                | 25                  | 260                  | 1           | 5.324                                                | 0.664          | 0.0414                               | 0.96           | 59 %                  |
| 7  | 1                | 25                  | 260                  | 1           | 5.459                                                | 0.665          | 0.0343                               | 0.98           | 56 %                  |
| 7  | 2.5              | 25                  | 260                  | 1           | 5.848                                                | 0.611          | 0.0290                               | 0.96           | 53 %                  |
| 7  | 0.5              | 25                  | 0                    | 1           | 2.419                                                | 0.962          | 0.0205                               | 0.81           | 39 %                  |
| 7  | 0.5              | 25                  | 20                   | 1           | 2.999                                                | 0.888          | 0.0246                               | 0.90           | 45 %                  |
| 7  | 0.5              | 25                  | 150                  | 1           | 3.613                                                | 0.785          | 0.032                                | 0.97           | 54 %                  |



**Table S5: PHE by-products**

| Index | Name                                                                                   | R. Time | R. Index | Chemical formula                                | SmilesRan                                         |
|-------|----------------------------------------------------------------------------------------|---------|----------|-------------------------------------------------|---------------------------------------------------|
| P1    | Phenanthrene                                                                           | 12.678  | 1782     | C <sub>14</sub> H <sub>10</sub>                 | C=1C=CC2=C(C1)C=CC=3C=CC=CC32                     |
| P2    | 9-methylidene-9H-fluorene                                                              | 12.678  | 1560     | C <sub>14</sub> H <sub>10</sub>                 | C=C1C=2C=CC=CC2C=3C=CC=CC13                       |
| P3    | 1,2-ditridecyl benzene-1,2-dicarboxylate                                               | 22.905  | 3826     | C <sub>34</sub> H <sub>58</sub> O <sub>4</sub>  | O=C(OCCCCCCCCCCCCC)C=1C=CC=CC1C(=O)OCCCCCCCCCCCCC |
| P4    | Phthalic acid, bis(7-methyloctyl) ester                                                | 9.013   | 2902     | C <sub>26</sub> H <sub>42</sub> O <sub>4</sub>  | O=C(OCCCCCCC(C)C)C=1C=CC=CC1C(=O)OCCCCCCC(C)C     |
| P5    | 1,2-Benzenedicarboxylic acid, diisooctyl ester                                         | 9.013   | 2704     | C <sub>24</sub> H <sub>38</sub> O <sub>4</sub>  | O=C(OCCCCCC(C)C)C=1C=CC=CC1C(=O)OCCCCCC(C)C       |
| P6    | 19-methyl-3,6,9,12,15-pentaoxabicyclo[15.3.1]henicosa-1(21),17,19-trien-21-ol          | 31.082  | 2764     | C <sub>17</sub> H <sub>26</sub> O <sub>6</sub>  | OC=1C2=CC(=CC1COCCOCCOCCOCCOC2)C                  |
| P7    | 3,6,9,12,15-pentaoxabicyclo[15.3.1]henicosa-1(21),17,19-trien-21-ol                    | 31.082  | 2651     | C <sub>16</sub> H <sub>24</sub> O <sub>6</sub>  | OC=1C2=CC=CC1COCCOCCOCCOCCOC2                     |
| P8    | 3,6,9,12,15,18,21,24,27,30-decaoxadotriacontane-1,32-diol                              | 35.202  | 2628     | C <sub>22</sub> H <sub>26</sub> O <sub>12</sub> | OCCOCCOCCOCCOCCOCCOCCOCCOCCOCCOCCO                |
| P9    | 2-[2-[2-[2-[2-[2-[2-(2-Hydroxyethoxy)ethoxy]ethoxy]ethoxy]ethoxy]ethoxy]ethoxy]ethanol | 35.202  | 2903     | C <sub>20</sub> H <sub>46</sub> O <sub>12</sub> | OCCOCCOCCOCCOCCOCCOCCOCCOCCOCCO                   |
| P10   | 3,6,9,12,15,18,21,24-octaoxahexacosane-1,26-diol                                       | 35.202  | 2903     | C <sub>18</sub> H <sub>38</sub> O <sub>10</sub> | OCCOCCOCCOCCOCCOCCOCCOCCOCCO                      |
| P11   | 3,6,9,12,15,18-hexaoxaicosane-1,20-diol                                                | 39.242  | 2354     | C <sub>14</sub> H <sub>30</sub> O <sub>8</sub>  | OCCOCCOCCOCCOCCOCCOCCO                            |
| P12   | 3,6,9,12,15-pentaoxaheptadecane-1,17-diol                                              | 39.242  | 2079     | C <sub>12</sub> H <sub>26</sub> O <sub>7</sub>  | OCCOCCOCCOCCOCCOCCO                               |
| P13   | 3,6,9,12-tetraoxatetradecane-1,14-diol                                                 | 32.915  | 1804     | C <sub>10</sub> H <sub>22</sub> O <sub>6</sub>  | OCCOCCOCCOCCOCCO                                  |
| P14   | Ethyl 2-ethoxy-2-hydroxyacetate                                                        | 29.062  | 1023     | C <sub>6</sub> H <sub>12</sub> O <sub>4</sub>   | O=C(OCC)C(O)OCC                                   |

|            |                                                                        |        |      |                                                |                                            |
|------------|------------------------------------------------------------------------|--------|------|------------------------------------------------|--------------------------------------------|
| <b>P15</b> | Dihydroxypropanedioic acid                                             | 28.958 | 1300 | C <sub>3</sub> H <sub>4</sub> O <sub>6</sub>   | O=C(O)C(O)(O)C(=O)O                        |
| <b>P16</b> | methyl 2-methoxy-3-(4-methoxy-2-methyl-4-oxobutanoyl)-6-methylbenzoate | 35.732 | 2212 | C <sub>16</sub> H <sub>20</sub> O <sub>6</sub> | O=C(OC)C1=C(OC)C(=CC=C1C)C(=O)C(C)CC(=O)OC |
| <b>P17</b> | (4-tert-butylphenoxy)methyl acetate                                    | 35.732 | 1563 | C <sub>13</sub> H <sub>18</sub> O <sub>3</sub> | O=C(OCOC1=CC=C(C=C1)C(C)(C)C)C             |
| <b>P18</b> | Methyl 2-(4-tert-butylphenoxy)acetate                                  | 35.732 | 1563 | C <sub>13</sub> H <sub>18</sub> O <sub>3</sub> | O=C(OC)COC1=CC=C(C=C1)C(C)(C)C             |
| <b>P19</b> | 4-(methoxymethoxy)benzaldehyde                                         | 20.727 | 1346 | C <sub>9</sub> H <sub>10</sub> O <sub>3</sub>  | O=CC1=CC=C(OCOC)C=C1                       |
| <b>P20</b> | Methoxyacetic acid, 4-hexadecyl ester                                  | 8.525  | 2089 | C <sub>19</sub> H <sub>38</sub> O <sub>3</sub> | O=C(OC(CCC)CCCCCCCCCCCC)COC                |
| <b>P21</b> | Methoxyacetic acid, 6-ethyl-3-octyl ester                              | 8.525  | 1428 | C <sub>13</sub> H <sub>26</sub> O <sub>3</sub> | O=C(OC(CC)CCC(CC)CC)COC                    |
| <b>P22</b> | Oxalic acid, 6-ethyloct-3-yl propyl ester                              | 8.615  | 1719 | C <sub>15</sub> H <sub>28</sub> O <sub>4</sub> | O=C(OCCC)C(=O)OC(CC)CCC(CC)CC              |
| <b>P23</b> | 3,7-dimethylnona-1,6-dien-3-ol                                         | 8.615  | 1183 | C <sub>11</sub> H <sub>20</sub> O              | OC(C=C)(C)CCC=C(C)CC                       |
| <b>P24</b> | Hept-6-ene-2,4-diol                                                    | 39.242 | 1032 | C <sub>7</sub> H <sub>14</sub> O <sub>2</sub>  | OC(C)CC(O)CC=C                             |
| <b>P25</b> | 1-(propan-2-yloxy)propan-2-ol                                          | 22.797 | 792  | C <sub>6</sub> H <sub>14</sub> O <sub>2</sub>  | OC(C)COC(C)C                               |
| <b>P26</b> | 2,4,6-trimethyl-1,3,5-trioxane                                         | 39.242 | 870  | C <sub>6</sub> H <sub>12</sub> O <sub>3</sub>  | O1C(OC(OC1C)C)C                            |
| <b>P27</b> | 2-ethoxypropane                                                        | 18.828 | 616  | C <sub>5</sub> H <sub>12</sub> O               | O(CC)C(C)C                                 |
| <b>P28</b> | Propan-2-yl formate                                                    | 22.797 | 619  | C <sub>4</sub> H <sub>8</sub> O <sub>2</sub>   | O=COC(C)C                                  |

**Table S6: The results of toxicity tests for PHE and its by-products**

| Compound index | Oral rat LD <sub>50</sub> |                       | Ames mutagenicity test |                    | Developmental toxicity test |                            |                  |
|----------------|---------------------------|-----------------------|------------------------|--------------------|-----------------------------|----------------------------|------------------|
|                | Prediction value (mg/kg)  | GHS toxicity Category | GHS Hazard statement   | Prediction results | Prediction value            | Prediction results         | Prediction value |
| <b>PHE</b>     | 2451.64                   | 5                     | Harmful if swallowed   | Positive           | 0.59                        | Developmental toxicant     | 0.97             |
| <b>P1</b>      | 3093.92                   | 5                     | Harmful if swallowed   | N/A                | N/A                         | Developmental toxicant     | 1.00             |
| <b>P2</b>      | 22531.82                  | 5                     | Harmful if swallowed   | Negative           | -0.01                       | Developmental toxicant     | 0.89             |
| <b>P3</b>      | 30743.30                  | 5                     | Harmful if swallowed   | Negative           | -0.03                       | Developmental toxicant     | 0.62             |
| <b>P4</b>      | 26460.18                  | 5                     | Harmful if swallowed   | Negative           | 0.20                        | Developmental toxicant     | 0.65             |
| <b>P5</b>      | 2482.20                   | 5                     | Harmful if swallowed   | Negative           | 0.04                        | Developmental NON-toxicant | 0.36             |
| <b>P6</b>      | 2868.75                   | 5                     | Harmful if swallowed   | Negative           | 0.02                        | Developmental NON-toxicant | 0.25             |
| <b>P7</b>      | 9005.15                   | 5                     | Harmful if swallowed   | Negative           | 0.38                        | Developmental NON-toxicant | -0.02            |
| <b>P8</b>      | 8614.13                   | 5                     | Harmful if swallowed   | Negative           | 0.38                        | Developmental NON-toxicant | -0.02            |
| <b>P9</b>      | 8156.67                   | 5                     | Harmful if swallowed   | Negative           | 0.38                        | Developmental NON-toxicant | -0.29            |
| <b>P10</b>     | 19680.47                  | 5                     | Harmful if swallowed   | Negative           | 0.37                        | Developmental NON-toxicant | -0.20            |
| <b>P11</b>     | 21685.78                  | 5                     | Harmful if swallowed   | Positive           | 0.58                        | Developmental NON-toxicant | -0.21            |
| <b>P12</b>     | 24142.26                  | 5                     | Harmful if             | Positive           | 0.61                        | Developmental              | 0.12             |

|            |          |     |                                      |          |       |                                           |      |
|------------|----------|-----|--------------------------------------|----------|-------|-------------------------------------------|------|
| <b>P13</b> | 6904.30  | 5   | swallowed<br>Harmful if<br>swallowed | Negative | 0.12  | NON-toxicant<br>Developmental<br>toxicant | 0.62 |
| <b>P14</b> | 3953.36  | 5   | Harmful if<br>swallowed              | Negative | 0.06  | Developmental<br>NON-toxicant             | 0.33 |
| <b>P15</b> | 2617.45  | 5   | Harmful if<br>swallowed              | Negative | 0.44  | Developmental<br>toxicant                 | 0.84 |
| <b>P16</b> | 1916.26  | 4   | Harmful if<br>swallowed              | Negative | 0.28  | Developmental<br>toxicant                 | 0.69 |
| <b>P17</b> | 1924.71  | 4   | Harmful if<br>swallowed              | Negative | 0.32  | Developmental<br>toxicant                 | 0.77 |
| <b>P18</b> | N/A      | N/A | N/A                                  | Negative | 0.03  | Developmental<br>toxicant                 | 0.94 |
| <b>P19</b> | 10020.22 | 5   | Harmful if<br>swallowed              | Negative | 0.24  | Developmental<br>NON-toxicant             | 0.12 |
| <b>P20</b> | 4114.74  | 5   | Harmful if<br>swallowed              | Negative | 0.27  | Developmental<br>NON-toxicant             | 0.24 |
| <b>P21</b> | 10304.43 | 5   | Harmful if<br>swallowed              | Negative | 0.44  | Developmental<br>NON-toxicant             | 0.32 |
| <b>P22</b> | 2572.82  | 5   | Harmful if<br>swallowed              | Negative | -0.09 | Developmental<br>toxicant                 | 0.99 |
| <b>P23</b> | 752.68   | 4   | Harmful if<br>swallowed              | Negative | 0.49  | Developmental<br>toxicant                 | 0.70 |
| <b>P24</b> | 4322.54  | 5   | Harmful if<br>swallowed              | Negative | 0.12  | Developmental<br>toxicant                 | 0.54 |
| <b>P25</b> | 2698.31  | 5   | Harmful if<br>swallowed              | Negative | 0.30  | Developmental<br>toxicant                 | 0.80 |
| <b>P26</b> | 1028.91  | 4   | Harmful if<br>swallowed              | Negative | 0.03  | Developmental<br>NON-toxicant             | 0.45 |
| <b>P27</b> | N/A      | N/A | N/A                                  | Negative | 0.28  | Developmental<br>toxicant                 | 0.80 |

---

## References

- 1 Z. Qin, Z. Zhao, W. Jiao, Z. Han, L. Xia, Y. Fang, S. Wang, L. Ji and Y. Jiang, Phenanthrene removal and response of bacterial community in the combined system of photocatalysis and PAH-degrading microbial consortium in laboratory system, *Bioresour Technol*, 2020, **301**, 122736, doi: 10.1016/j.biortech.2020.122736.
- 2 V. M. A. Magalhães, G. P. Mendes, J. D. B. Costa-Filho, R. Cohen, C. S. M. Partiti, M. M. G. R. Vianna and O. Chiavone-Filho, Clay-based catalyst synthesized for chemical oxidation of phenanthrene contaminated soil using hydrogen peroxide and persulfate, *J Environ Chem Eng*, 2020, **8**, 103568. doi: 10.1016/j.jece.2019.103568.
- 3 F. Pardo, M. Peluffo, A. Santos and A. Romero, Optimization of the application of the Fenton chemistry for the remediation of a contaminated soil with polycyclic aromatic hydrocarbons, *J Chem Technol Biotechnol*, 2016, **91**, 1763–1772. doi: 10.1002/jctb.4767.
- 4 Y. Tao, O. Monfort, M. Brigante, H. Zhang and G. Mailhot, Phenanthrene decomposition in soil washing effluents using UVB activation of hydrogen peroxide and peroxydisulfate, *Chemosphere*, 2021, **263**, 127996. doi: 10.1016/j.chemosphere.2020.127996.
- 5 L. Peng, D. Deng and F. Ye, Efficient oxidation of high levels of soil-sorbed phenanthrene by microwave-activated persulfate: implication for in situ subsurface remediation engineering, *J Soils Sediments*, 2016, **16**, 28–37. doi: 10.1007/s11368-015-1176-5.
- 6 C. K. O. Da Silva, M. M. G. R. Vianna, E. L. Foletto, O. Chiavone-Filho and C. A. O. Do Nascimento, Optimizing phenanthrene and anthracene oxidation by sodium persulfate and Fe-modified diatomite using the response surface method, *Water Air Soil Pollut*, 2015, **266**, 88. doi: 10.1007/s11270-015-2362-1.
- 7 D. Wen, X. Guo, Q. Li and R. Fu, Enhanced electrokinetically-delivered persulfate and alternating electric field induced thermal effect activated persulfate in situ for remediation of phenanthrene contaminated clay, *J Hazard Mater*, 2022, **423**, 127199. doi: 10.1016/j.jhazmat.2021.127199.
- 8 Z. Liu, Z. Gao and X. Lu, An Integrated Approach to Remove PAHs from Highly Contaminated Soil: Electro-Fenton Process and Bioslurry Treatment, *Water Air Soil Pollut*, 2020, **231**, 314. doi: 10.1007/s11270-020-04696-7.
- 9 X. Bai, Y. Wang, X. Zheng, K. Zhu, A. Long, X. Wu and H. Zhang, Remediation of phenanthrene contaminated soil by coupling soil washing with Tween 80, oxidation using the UV/S<sub>2</sub>O<sub>8</sub><sup>2-</sup> process and recycling of the surfactant, *Chem Eng J*, 2019, **369**, 1014–1023. doi: 10.1016/j.cej.2019.03.116.
